# Supplementary material
Source: publisher figshare collection journal article supplement (https://acs.figshare.com/ndownloader/files/3937234)
Supplement: Supplementary file 1 [file 3937234]

# Supplemental Materials for "Vapour Condensed and Supercooled Glassy Nanoclusters"

Weikai Qi<sup>1</sup> and Richard K. Bowles<sup>1,\*</sup>

<sup>1</sup>*Department of Chemistry, University of Saskatchewan, Saskatoon, Saskatchewan S7N 5C9, Canada*

(Dated: November 23, 2015)

## I. OVERVIEW

This work contains the supplemental material for our work exploring the supercooled or vapour condensation glassy Lennard-Jones clusters.

## II. BOND ORDER PARAMETERS

To distinguish between amorphous and crystalline atoms in a nanocluster, we calculate the bond order parameter. A local six-fold complex vector  $q_{l,m}(i)$  for atom  $i$  is defined as

$$q_{6,m}(i) = \frac{1}{nn(i)} \sum_{j=1}^{nn(i)} Y_{6,m}(\mathbf{r}_{ij}), \quad (1)$$

where  $nn(i)$  is the number of nearest neighbors of atom  $i$ ,  $Y_{6,m}(\mathbf{r}_{ij})$  is the spherical harmonic function with  $m \in [-6, 6]$  and  $\mathbf{r}_{ij}$  is the vector from atom  $i$  to atom  $j$ . The number of crystalline bond for atom  $i$  is given by

$$n_c(i) = \sum_{j=1}^{nn(i)} H(u_6(i, j) - u_c), \quad (2)$$

where  $H$  is the Heaviside step function,  $u_c = 0.7$  is a threshold value, and  $u_6(i, j)$  is the correlation between the bond orientational order of atoms  $i$  and  $j$  defined as

$$u_6(i, j) = \frac{\sum_{m=-6}^6 q_{6,m}(i) q_{6,m}^*(j)}{\left( \sum_{m=-6}^6 |q_{6,m}(i)|^2 \right)^{1/2} \left( \sum_{m=-6}^6 |q_{6,m}(j)|^2 \right)^{1/2}}. \quad (3)$$

In the glassy nanoclusters, amorphous atoms rarely have more than four crystalline bonds. The atoms that were identified as crystalline usually have more than nine bonds. Figure S1 shows a configuration in a supercooled glassy nanocluster at  $T^* = 0.1$ , containing two crystalline atoms with  $n_c \leq 5$ . In general, we find that no more than 5 atoms ( $< 1\%$ ) are crystalline, which suggests all the nanoclusters studied here are glassy.

We also calculated the local bond order parameter or Steinhardt order parameter for atom  $i$ , which is defined as

$$q_6(i) = \sqrt{\frac{4\pi}{13} \sum_{m=-6}^6 |q_{6,m}(i)|^2}. \quad (4)$$

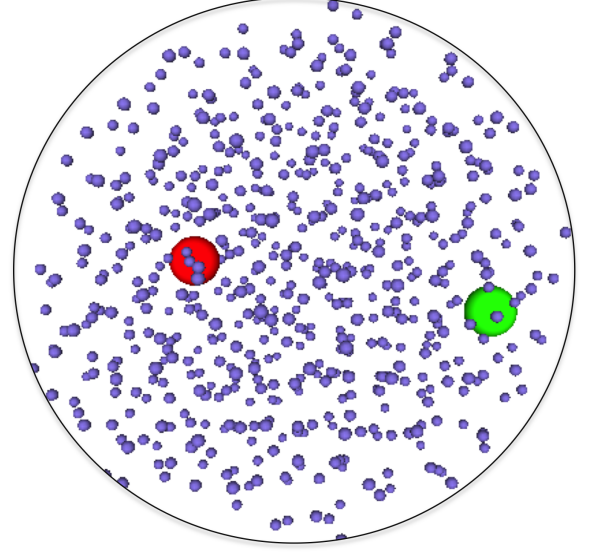

FIG. S1. A typical configuration for a supercooled glassy nanocluster prepared at temperature  $T^* = 0.1$  with cooling rate  $3.3 \times 10^{-3}$ . Small atoms are amorphous atoms with  $n_c < 5$  and large atoms are crystalline with  $n_c = 5$  (red) and  $n_c = 6$  (green).

Figure S2 shows the distribution of  $q_6(i)$  for supercooled glassy nanoclusters (SCGN) prepared with a cooling rate of  $\gamma = 3.3 \times 10^{-6}$  and vapour condensed glassy nanoclusters (VCGN) prepared with a cooling rate  $\gamma = 3.3 \times 10^{-4}$  at temperature  $T = 0.30$ . There is little or no difference between the distributions of  $q_6$  for the two types of glassy nanoclusters. For all the atoms in the nanoclusters, the value of  $q_6$  is smaller than 0.01. Again, this result indicates no crystallization has occurred in the glassy nanoclusters.

## III. COORDINATION NUMBERS AND LOCAL POLYHEDRA

We analyse the number of nearest-neighbours around  $B$ -type atoms using Voronoi tessellation. Figure S3 shows the distribution of coordination numbers of  $B$ -type atoms for SCGN and VCGN at  $T = 0.26$ , which is similar to the results of bulk glass, with most of the  $B$ -type atoms having coordination numbers between 9 and 13. The favoured local structure for the bulk Kob-Andersen model is thought to be the bicapped square an-

\* richard.bowles@usask.ca

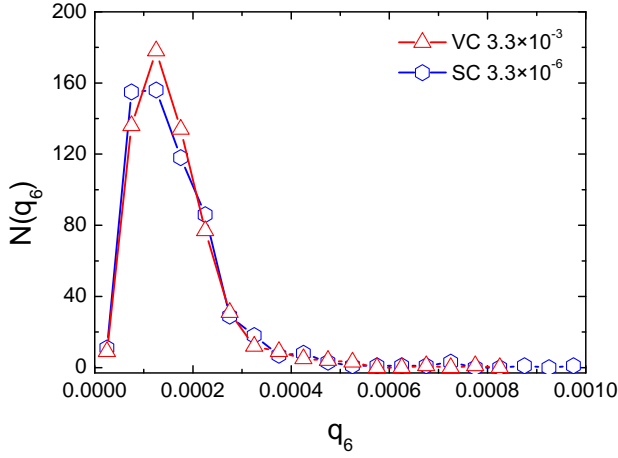

FIG. S2. Distribution of the  $q_6$  Steinhardt order parameter for VCGN with cooling rate  $3.3 \times 10^{-3}$  and SCGN with cooling rate  $3.3 \times 10^{-6}$  at  $T = 0.3$ .

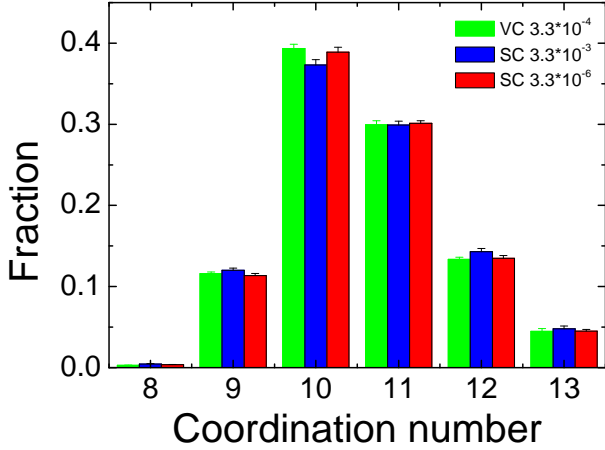

FIG. S3. Distribution of coordination numbers for SCGN and VCGN prepared at temperature  $T = 0.26$  with cooling rates as marked. The error bars represent the standard deviation for data obtained from ten independent runs.

tiprism, which is a polyhedra with one central  $B$ -type atom surrounded by ten neighbours. This is consistent with our results. There are no significant differences between the coordination numbers of the SCGN prepared with cooling rate of  $\gamma = 3.3 \times 10^{-6}$  and the VCGN prepared with cooling rate of  $\gamma = 3.3 \times 10^{-4}$ , where the inherent structure energy for both glassy nanoclusters is very close. However, there are less atoms with a coordination number of ten in the SCGN prepared with  $\gamma = 3.3 \times 10^{-3}$ , suggesting it may be less stable than the other two glassy nanoclusters.

The local polyhedral structure of the  $B$ -type atoms

can also be characterized by their Voronoi index  $\langle n_3, n_4, n_5, n_6 \rangle$ . The ultrastable glasses formed through vapour deposition onto a surface are characterized by an excess of regular polyhedra of the types,  $\langle 0, 2, 8, 0 \rangle$ ,  $\langle 0, 2, 8, 1 \rangle$ ,  $\langle 0, 0, 12, 0 \rangle$ , and a decrease in irregular polyhe-

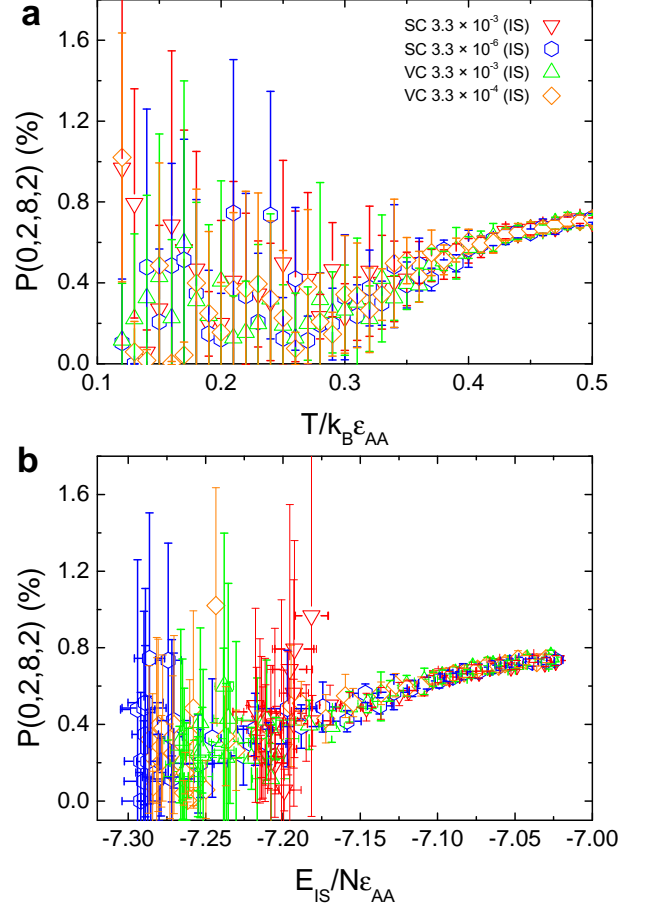

FIG. S4. Fraction of  $\langle 0, 2, 8, 2 \rangle$  as a function of temperature (a) and inherent structure energy (b) in the inherent structures of SCGN and VCGN with cooling rate as labeled.

dra,  $\langle 0, 2, 8, 2 \rangle$  and  $\langle 1, 2, 7, 1 \rangle$ . Based on the Voronoi analyses, we calculated the fraction of polyhedra  $P(N_p) = N_p/N_B$ , where  $N_p$  is number of one type of polyhedra and  $N_B$  is number of  $B$ -type atoms. The main text shows that the fraction of  $\langle 0, 2, 8, 0 \rangle$  polyhedra, which includes the bicapped square antiprism, is significantly increased in the nanocluster systems. However, the nanoclusters see a decrease in the number of  $\langle 0, 2, 8, 1 \rangle$  polyhedra and icosahedra, denoted  $\langle 0, 0, 12, 0 \rangle$ , are completely eliminated by  $T \approx 0.35$ . Figure S4 also shows that the fraction of  $\langle 0, 2, 8, 2 \rangle$  polyhedra tend to decrease with  $T$ , but there are significant fluctuations below the glass transition temperature.
